# Supplementary material for: Patients with isolated REM-sleep behavior disorder have elevated levels of alpha-synuclein aggregates in stool
Source: PubMed Central journal article supplement (PMC9895074; doi:10.1038/s41531-023-00458-4), 2023-02-02
Supplement: 41531_2023_458_MOESM1_ESM.pdf [file 41531_2023_458_MOESM1_ESM.pdf]

# Patients with isolated REM-sleep behavior disorder have elevated levels of alpha-synuclein aggregates in stool

Anja Schaffrath<sup>1</sup>, Sophia Schleyken<sup>2</sup>, Aline Seger<sup>2</sup>, Hannah Jergas<sup>2</sup>, Pelin Özdüzenciler<sup>1</sup>, Marlene Pils<sup>1,3</sup>, Lara Blömeke<sup>1,3</sup>, Anneliese Cousin<sup>1</sup>, Johannes Willbold<sup>1</sup>, Tuyen Bujnicki<sup>1</sup>, Oliver Bannach<sup>1,3,4</sup>, Gereon R. Fink<sup>2,5</sup>, Dieter Willbold<sup>1,4</sup>, Michael Sommerauer<sup>2,5</sup>, Michael T. Barbe<sup>2</sup>, Gültekin Tamgüney<sup>1,4</sup>

## SUPPLEMENTARY RESULTS

**Supplementary Table 1** Demographic and clinical information and concentrations of  $\alpha$ -synuclein aggregates in stool of individual subjects

| Sample | Diagnosis | Sex    | Age at sampling [years] | Age at onset [years] | Disease duration [years] | Education [years] | CCSSS score | DemTect score | NMSS score | MDS-UDPRS III score | Scent score | Hoehn and Yahr score | Levodopa challenge test [% change] | DaTSCAN score | Screening questionnaire PD score | RBDSQ score | $\alpha$ -Synuclein aggregate concentration $\pm$ SD [fM] |
|--------|-----------|--------|-------------------------|----------------------|--------------------------|-------------------|-------------|---------------|------------|---------------------|-------------|----------------------|------------------------------------|---------------|----------------------------------|-------------|-----------------------------------------------------------|
| 1      | PD        | Male   | 73                      | 60                   | 13                       | 18                | 9           | 13            | 37         | 22                  | 4           | 4                    | 0.692                              | +             | 5                                | 7           | 1.38 $\pm$ 0.22                                           |
| 2      | PD        | Male   | 68                      | 54                   | 14                       | 10                | 10          | 13            | 17         | 27                  | 6           | 3                    | 0.333                              | N/A           | 6                                | 10          | 0.88 $\pm$ 1.07                                           |
| 3      | PD        | Male   | 56                      | 45                   | 11                       | 12                | 3           | 17            | 51         | 35                  | 7           | 4                    | 0.529                              | +             | 5                                | 8           | 9.20 $\pm$ 2.85                                           |
| 4      | PD        | Male   | 71                      | 61                   | 10                       | 17                | 1           | 11            | 67         | 65                  | 8           | 5                    | 0.239                              | +             | 9                                | 6           | 104.73 $\pm$ 17.43                                        |
| 5      | PD        | Male   | 46                      | 41                   | 5                        | 12                | 0           | 14            | 103        | 21                  | 3           | 3                    | 0.438                              | N/A           | 6                                | 2           | 0.26 $\pm$ 0.25                                           |
| 6      | PD        | Male   | 72                      | 57                   | 15                       | 19                | 6           | 14            | 54         | 28                  | 5           | 5                    | 0.469                              | N/A           | 4                                | 5           | 0.98 $\pm$ 0.55                                           |
| 7      | PD        | Male   | 54                      | 50                   | 4                        | 16                | 0           | 18            | 20         | 19                  | 2           | 2                    | 0.467                              | +             | 7                                | 0           | 1.51 $\pm$ 0.88                                           |
| 8      | PD        | Female | 71                      | 49                   | 22                       | 12                | 4           | 9             | 67         | 20                  | 9           | 3                    | 0.481                              | N/A           | 9                                | 4           | 5.58 $\pm$ 2.07                                           |
| 9      | PD        | Male   | 56                      | 52                   | 4                        | 16                | 2           | 15            | 9          | 33                  | 7           | 5                    | 0.320                              | N/A           | 7                                | 5           | 2.97 $\pm$ 0.73                                           |
| 10     | PD        | Male   | 62                      | 50                   | 12                       | 20                | 0           | 18            | 9          | 10                  | 2           | 2                    | 0.462                              | +             | 8                                | 3           | 4.28 $\pm$ 0.51                                           |
| 11     | PD        | Male   | 80                      | 78                   | 2                        | 8                 | 3           | 14            | 4          | 17                  | 3           | 2                    | N/A                                | N/A           | 1                                | 0           | 4.28 $\pm$ 1.87                                           |
| 12     | PD        | Female | 78                      | 63                   | 15                       | 11                | 18          | 17            | 48         | 76                  | 2           | 5                    | 0.431                              | N/A           | 6                                | 4           | 108.40 $\pm$ 20.31                                        |
| 13     | PD        | Male   | 68                      | 58                   | 10                       | 18                | 9           | 16            | 4          | 17                  | 3           | 4                    | 0.632                              | N/A           | 5                                | 2           | 1.53 $\pm$ 0.73                                           |

|    |    |        |    |    |    |    |    |    |    |    |    |   |       |     |   |    |                |
|----|----|--------|----|----|----|----|----|----|----|----|----|---|-------|-----|---|----|----------------|
| 14 | PD | Female | 80 | 66 | 14 | 13 | 11 | 13 | 34 | 25 | 7  | 4 | 0.528 | +   | 7 | 1  | 0.40 ± 0.33    |
| 15 | PD | Female | 52 | 35 | 17 | 19 | 1  | 12 | 27 | 23 | 4  | 4 | 0.577 | N/A | 5 | 7  | 0.19 ± 0.08    |
| 16 | PD | Female | 74 | 60 | 14 | 17 | 9  | 10 | 21 | 50 | 2  | 5 | 0.323 | N/A | 9 | 6  | 4.28 ± 0.75    |
| 17 | PD | Male   | 63 | 54 | 9  | 13 | 1  | 12 | 12 | 15 | 4  | 2 | 0.639 | +   | 7 | 4  | 5.72 ± 0.89    |
| 18 | PD | Male   | 74 | 62 | 12 | 12 | 3  | 11 | 21 | 8  | 0  | 2 | 0.320 | N/A | 2 | 3  | 10.52 ± 3.99   |
| 19 | PD | Male   | 82 | 73 | 9  | 12 | 0  | 9  | 46 | 23 | 8  | 4 | 0.378 | N/A | 7 | 5  | 2.22 ± 0.39    |
| 20 | PD | Female | 50 | 39 | 11 | 14 | 2  | 11 | 16 | 22 | 7  | 2 | 0.459 | +   | 5 | 2  | 1.14 ± 0.11    |
| 21 | PD | Female | 56 | 51 | 5  | 12 | 0  | 15 | 4  | 30 | 9  | 3 | 0.321 | +   | 7 | 5  | 1.04 ± 0.48    |
| 22 | PD | Female | 60 | 51 | 9  | 17 | 3  | 17 | 16 | 16 | 7  | 2 | 0.423 | +   | 7 | 2  | 0.60 ± 0.25    |
| 23 | PD | Male   | 60 | 40 | 20 | 12 | 7  | 18 | 15 | 30 | 3  | 3 | 0.474 | N/A | 5 | 3  | 462.07 ± 46.48 |
| 24 | PD | Male   | 57 | 39 | 18 | 15 | 7  | 12 | 42 | 41 | 6  | 3 | 0.400 | +   | 5 | 8  | 7.56 ± 1.15    |
| 25 | PD | Male   | 59 | 56 | 3  | 17 | 13 | 18 | 46 | 7  | 4  | 2 | 0.483 | N/A | 7 | 9  | 673.25 ± 19.52 |
| 26 | PD | Female | 58 | 58 | 0  | 20 | 2  | 18 | 52 | 16 | 1  | 2 | N/A   | +   | 0 | 11 | 2.52 ± 0.37    |
| 27 | PD | Male   | 68 | 62 | 6  | 20 | 1  | 17 | 10 | 5  | 6  | 2 | N/A   | +   | 4 | 2  | 0.07 ± 0.06    |
| 28 | PD | Male   | 76 | 74 | 2  | 13 | 1  | 11 | 21 | 35 | 6  | 3 | N/A   | N/A | 6 | 8  | 2.49 ± 0.76    |
| 29 | PD | Male   | 60 | 51 | 9  | 21 | 4  | 14 | 56 | 22 | 1  | 3 | 0.486 | N/A | 8 | 5  | 1.19 ± 0.30    |
| 30 | PD | Male   | 59 | 54 | 5  | 19 | 4  | 18 | 28 | 33 | 6  | 3 | N/A   | +   | 7 | 12 | 3.87 ± 1.14    |
| 31 | PD | Male   | 65 | 63 | 2  | 15 | 6  | 12 | 28 | 42 | 5  | 4 | 0.431 | N/A | 9 | 8  | 7.09 ± 0.54    |
| 32 | PD | Male   | 41 | 40 | 1  | 22 | 2  | 18 | 7  | 11 | 10 | 2 | N/A   | +   | 2 | 3  | 6.89 ± 0.60    |
| 33 | PD | Male   | 66 | 45 | 21 | 15 | 5  | 18 | 14 | 11 | 6  | 2 | 0.000 | +   | 4 | 4  | 1.57 ± 0.52    |
| 34 | PD | Female | 60 | 50 | 10 | 13 | 12 | 13 | 27 | 19 | 6  | 3 | 0.429 | +   | 8 | 7  | 3.51 ± 0.72    |

|    |    |        |    |    |    |    |    |    |    |     |    |   |        |     |   |    |               |
|----|----|--------|----|----|----|----|----|----|----|-----|----|---|--------|-----|---|----|---------------|
| 35 | PD | Male   | 71 | 66 | 5  | 12 | 2  | 8  | 30 | 42  | 9  | 4 | 0.250  | +   | 4 | 1  | 0.27 ± 0.09   |
| 36 | PD | Male   | 58 | 54 | 4  | 15 | 2  | 11 | 42 | 10  | 8  | 3 | 0.692  | N/A | 7 | 6  | 1.30 ± 0.92   |
| 37 | PD | Female | 70 | 57 | 13 | 8  | 11 | 11 | 25 | 22  | 8  | 3 | 0.441  | N/A | 6 | 4  | 0.19 ± 0.03   |
| 38 | PD | Male   | 55 | 41 | 14 | 9  | 12 | 7  | 30 | 50  | 6  | 4 | 0.447  | N/A | 8 | 6  | 1.32 ± 0.29   |
| 39 | PD | Male   | 68 | 64 | 4  | 13 | 6  | 9  | 65 | 21  | 3  | 3 | N/A    | +   | 9 | 6  | 2.19 ± 0.35   |
| 40 | PD | Male   | 78 | 71 | 7  | 18 | 7  | 10 | 10 | 19  | 7  | 3 | N/A    | +   | 8 | 12 | 45.51 ± 12.8  |
| 41 | PD | Male   | 55 | 50 | 5  | 16 | 1  | 14 | 1  | 5   | 8  | 2 | 0.538  | N/A | 3 | 5  | 5.79 ± 2.57   |
| 42 | PD | Female | 49 | 44 | 5  | 15 | 5  | 18 | 13 | 9   | 8  | 3 | 0.000  | N/A | 7 | 3  | 1.47 ± 0.11   |
| 43 | PD | Female | 65 | 50 | 15 | 25 | 4  | 17 | 22 | N/A | 5  | 4 | 0.219  | N/A | 5 | 11 | 4.01 ± 0.43   |
| 44 | PD | Male   | 41 | 37 | 4  | 20 | 3  | 14 | 17 | 18  | 6  | 3 | N/A    | +   | 6 | 1  | 2.78 ± 0.30   |
| 45 | PD | Male   | 69 | 58 | 11 | 16 | 3  | 10 | 20 | 21  | 6  | 3 | 0.517  | N/A | 5 | 5  | 2.42 ± 0.28   |
| 46 | PD | Male   | 63 | 53 | 10 | 13 | 8  | 14 | 21 | 13  | 10 | 2 | 0.313  | +   | 7 | 8  | 4.61 ± 0.73   |
| 47 | PD | Male   | 71 | 65 | 6  | 12 | 3  | 10 | 26 | 48  | 4  | 3 | 0.163  | +   | 7 | 1  | 0.61 ± 0.38   |
| 48 | PD | Female | 78 | 64 | 14 | 20 | 6  | 18 | 23 | 30  | 4  | 3 | 0.286  | N/A | 7 | 2  | 28.42 ± 1.67  |
| 49 | PD | Male   | 76 | 60 | 16 | 12 | 11 | 13 | 90 | 31  | 6  | 4 | 0.300  | N/A | 6 | 9  | 1.72 ± 0.22   |
| 50 | PD | Male   | 55 | 55 | 0  | 30 | 0  | 17 | 2  | 5   | 7  | 2 | N/A    | +   | 1 | 3  | 10.82 ± 1.36  |
| 51 | PD | Male   | 77 | 65 | 12 | 18 | 3  | 13 | 26 | 26  | 7  | 3 | -0.023 | N/A | 4 | 8  | 57.33 ± 12.05 |
| 52 | PD | Male   | 64 | 52 | 12 | 22 | 9  | 16 | 20 | 25  | 7  | 2 | 0.933  | N/A | 8 | 4  | 6.72 ± 1.13   |
| 53 | PD | Male   | 83 | 73 | 10 | 22 | 8  | 18 | 36 | 54  | 5  | 4 | N/A    | N/A | 6 | 7  | 28.19 ± 3.40  |
| 54 | PD | Male   | 62 | 53 | 9  | 18 | 3  | 15 | 44 | 6   | 2  | 2 | 0.333  | +   | 5 | 6  | 1.03 ± 1.01   |
| 55 | PD | Female | 70 | 63 | 7  | 14 | 0  | 12 | 18 | 13  | 6  | 3 | 0.368  | N/A | 8 | 4  | 3.82 ± 0.35   |

|    |    |        |    |    |    |     |     |    |     |    |    |   |       |     |     |     |                |
|----|----|--------|----|----|----|-----|-----|----|-----|----|----|---|-------|-----|-----|-----|----------------|
| 56 | PD | Female | 74 | 61 | 13 | 8   | 3   | 12 | 19  | 63 | 4  | 5 | N/A   | N/A | 7   | 7   | 15.3 ± 0.73    |
| 57 | PD | Female | 77 | 50 | 27 | 13  | 1   | 18 | 67  | 30 | 2  | 4 | 0.567 | N/A | 9   | 7   | 48.39 ± 6.44   |
| 58 | PD | Female | 62 | 48 | 14 | 23  | 7   | 18 | 11  | 40 | 7  | 5 | 0.093 | +   | 6   | 4   | 21.84 ± 2.24   |
| 59 | PD | Female | 75 | 49 | 26 | 16  | 2   | 9  | 36  | 25 | 2  | 3 | N/A   | N/A | 5   | 4   | 2.97 ± 1.59    |
| 60 | PD | Male   | 59 | 57 | 2  | 14  | 1   | 14 | 29  | 41 | 9  | 3 | N/A   | N/A | 4   | 3   | 0.98 ± 0.48    |
| 61 | PD | Male   | 68 | 58 | 10 | 14  | 0   | 18 | 24  | 24 | 0  | 2 | 0.609 | N/A | 7   | 4   | 16.89 ± 0.56   |
| 62 | PD | Male   | 73 | 68 | 5  | 18  | 0   | 18 | 14  | 22 | 7  | 3 | N/A   | +   | 3   | 4   | 1.07 ± 0.07    |
| 63 | PD | Male   | 57 | 49 | 8  | 15  | 1   | 14 | 13  | 10 | 9  | 2 | 0.545 | N/A | 3   | 2   | 10.23 ± 1.20   |
| 64 | PD | Female | 54 | 45 | 9  | 16  | 2   | 18 | 15  | 9  | 10 | 3 | 0.686 | +   | 7   | 3   | 24.45 ± 9.80   |
| 65 | PD | Female | 57 | 45 | 12 | 12  | 2   | 18 | 122 | 26 | 7  | 2 | 0.720 | N/A | 8   | 7   | 27.74 ± 1.61   |
| 66 | PD | Female | 68 | 51 | 17 | 12  | 0   | 17 | 19  | 19 | 8  | 4 | 0.318 | N/A | 2   | 8   | 3.70 ± 0.30    |
| 67 | PD | Female | 64 | 57 | 7  | 20  | 8   | 13 | 59  | 21 | 8  | 3 | 0.629 | N/A | 8   | 11  | 0.23 ± 0.15    |
| 68 | PD | Male   | 56 | 48 | 8  | 13  | 10  | 12 | 39  | 22 | 4  | 3 | 0.310 | +   | 6   | 6   | 1.34 ± 0.68    |
| 69 | PD | Female | 74 | 73 | 1  | 17  | 2   | 15 | 15  | 16 | 8  | 3 | N/A   | +   | 6   | 9   | 119.51 ± 12.54 |
| 70 | PD | Male   | 46 | 36 | 10 | 24  | 1   | 15 | 22  | 16 | 9  | 2 | 0.667 | +   | 6   | 3   | 3.34 ± 0.58    |
| 71 | PD | Female | 69 | 56 | 13 | 11  | 7   | 15 | 51  | 28 | 4  | 3 | 0.415 | N/A | 7   | 6   | 0.43 ± 0.19    |
| 72 | PD | Male   | 55 | 53 | 2  | 18  | 12  | 14 | 50  | 17 | 3  | 2 | N/A   | N/A | 8   | 6   | 14.38 ± 9.20   |
| 73 | PD | Male   | 78 | 60 | 18 | 17  | 2   | 12 | 36  | 59 | 3  | 5 | N/A   | N/A | 7   | 5   | 14.16 ± 1.74   |
| 74 | PD | Male   | 52 | 45 | 7  | 16  | 7   | 9  | 51  | 21 | 8  | 3 | 0.346 | +   | 6   | 2   | 1.09 ± 0.48    |
| 75 | PD | Female | 57 | 55 | 2  | 15  | 2   | 18 | 12  | 6  | 6  | 3 | 0.733 | +   | 1   | 1   | 49.21 ± 4.31   |
| 76 | PD | Male   | 55 | 45 | 10 | N/A | N/A | 7  | 79  | 22 | 7  | 3 | 0.478 | +   | N/A | N/A | 3.56 ± 1.25    |

|    |      |        |    |     |     |    |     |    |    |    |    |     |       |     |   |    |                |
|----|------|--------|----|-----|-----|----|-----|----|----|----|----|-----|-------|-----|---|----|----------------|
| 77 | PD   | Male   | 60 | 57  | 3   | 10 | 0   | 12 | 55 | 36 | 2  | 3   | N/A   | +   | 1 | 1  | 7.97 ± 1.47    |
| 78 | PD   | Male   | 52 | 46  | 6   | 18 | 6   | 13 | 0  | 5  | 6  | 2   | 0.000 | N/A | 3 | 1  | 1.10 ± 0.57    |
| 79 | PD   | Male   | 51 | 40  | 11  | 14 | 7   | 8  | 10 | 31 | 4  | 4   | 0.485 | +   | 5 | 5  | 10.30 ± 1.23   |
| 80 | PD   | Male   | 73 | 72  | 1   | 14 | 15  | 15 | 62 | 23 | 1  | 3   | N/A   | N/A | 5 | 1  | 57.08 ± 5.86   |
| 81 | PD   | Male   | 66 | 55  | 11  | 12 | 0   | 14 | 51 | 13 | 7  | 2   | N/A   | +   | 4 | 2  | 4.46 ± 0.90    |
| 82 | PD   | Female | 67 | 53  | 14  | 12 | 3   | 15 | 57 | 31 | 8  | 4   | 0.341 | N/A | 9 | 10 | 11.45 ± 1.64   |
| 83 | PD   | Male   | 72 | 66  | 6   | 13 | 1   | 15 | 13 | 12 | 5  | 3   | N/A   | N/A | 7 | 9  | 20.57 ± 0.95   |
| 84 | PD   | Male   | 59 | 49  | 10  | 13 | 3   | 14 | 29 | 13 | 3  | 2   | 0.474 | N/A | 7 | 2  | 1.81 ± 0.66    |
| 85 | PD   | Male   | 74 | 68  | 6   | 8  | 2   | 9  | 6  | 42 | 6  | N/A | 0.543 | N/A | 4 | 1  | 0.13 ± 0.12    |
| 86 | PD   | Female | 62 | 56  | 6   | 16 | 0   | 13 | 13 | 10 | 2  | 2   | N/A   | N/A | 2 | 6  | 8.78 ± 0.89    |
| 87 | PD   | Male   | 71 | 64  | 7   | 19 | 0   | 18 | 18 | 29 | 3  | 3   | N/A   | N/A | 5 | 1  | 0.60 ± 0.28    |
| 88 | PD   | Male   | 51 | 51  | 0   | 13 | 1   | 17 | 12 | 11 | 3  | 2   | N/A   | +   | 4 | 11 | 15.51 ± 2.65   |
| 89 | PD   | Female | 57 | 56  | 1   | 14 | 3   | 13 | 24 | 6  | 8  | 2   | N/A   | +   | 5 | 4  | 1.34 ± 0.91    |
| 90 | PD   | Male   | 78 | 72  | 6   | 13 | 0   | 17 | 11 | 14 | 6  | 3   | 0.444 | +   | 2 | 1  | 0.80 ± 0.41    |
| 91 | PD   | Male   | 62 | 59  | 3   | 22 | 1   | 14 | 13 | 7  | 7  | 2   | N/A   | +   | 2 | 3  | 40.25 ± 2.04   |
| 92 | PD   | Male   | 81 | 69  | 12  | 13 | 4   | 2  | 64 | 55 | 1  | 5   | N/A   | N/A | 7 | 4  | 21.44 ± 1.33   |
| 93 | PD   | Male   | 64 | 63  | 1   | 18 | 0   | 13 | 12 | 4  | 2  | 2   | N/A   | +   | 3 | 3  | 151.19 ± 19.38 |
| 94 | PD   | Male   | 80 | 77  | 3   | 10 | 1   | 13 | 31 | 17 | 1  | 2   | 0.143 | +   | 4 | 3  | 8.73 ± 1.92    |
| 95 | iRBD | Male   | 56 | N/A | N/A | 21 | 2   | 17 | 6  | 1  | 11 | N/A | N/A   | N/A | 0 | 6  | 10.01 ± 2.42   |
| 96 | iRBD | Male   | 72 | 60  | 12  | 3  | N/A | 16 | 1  | 4  | 11 | N/A | N/A   | N/A | 2 | 6  | 2.83 ± 1.15    |
| 97 | iRBD | Male   | 61 | N/A | N/A | 16 | N/A | 14 | 4  | 5  | 11 | N/A | N/A   | N/A | 0 | 6  | 10.99 ± 2.60   |

|     |      |        |    |     |     |     |     |    |     |    |    |     |     |     |     |     |                |
|-----|------|--------|----|-----|-----|-----|-----|----|-----|----|----|-----|-----|-----|-----|-----|----------------|
| 98  | iRBD | Female | 59 | 55  | 4   | 20  | 4   | 17 | 14  | 0  | 6  | N/A | N/A | N/A | 0   | 10  | 15.96 ± 1.49   |
| 99  | iRBD | Male   | 78 | N/A | N/A | 14  | N/A | 17 | 15  | 4  | 8  | N/A | N/A | N/A | 0   | 10  | 6.04 ± 2.12    |
| 100 | iRBD | Female | 67 | 50  | 17  | 12  | 3   | 13 | N/A | 8  | 5  | N/A | N/A | N/A | 0   | 9   | 5.54 ± 1.44    |
| 101 | iRBD | Male   | 63 | 63  | 0   | 16  | 2   | 17 | 3   | 5  | 10 | N/A | N/A | N/A | 0   | 8   | 0.74 ± 0.86    |
| 102 | iRBD | Male   | 58 | 54  | 4   | 16  | 0   | 13 | N/A | 6  | 9  | N/A | N/A | N/A | 0   | 10  | 8.37 ± 1.95    |
| 103 | iRBD | Female | 64 | 61  | 3   | 21  | 0   | 15 | N/A | 3  | 3  | N/A | N/A | N/A | 0   | 7   | 4.34 ± 0.80    |
| 104 | iRBD | Male   | 64 | 63  | 1   | 15  | 4   | 11 | N/A | 2  | 7  | N/A | N/A | +   | 0   | 8   | 4.12 ± 0.80    |
| 105 | iRBD | Male   | 70 | 60  | 10  | N/A | 0   | 14 | 12  | 5  | 10 | N/A | N/A | N/A | 0   | 12  | 5.11 ± 1.11    |
| 106 | iRBD | Male   | 66 | 52  | 14  | 17  | 0   | 12 | 4   | 5  | 7  | N/A | N/A | +   | 0   | 11  | 5.9 ± 0.68     |
| 107 | iRBD | Male   | 73 | 71  | 2   | N/A | N/A | 12 | 2   | 4  | 6  | N/A | N/A | N/A | N/A | N/A | 24.42 ± 5.82   |
| 108 | iRBD | Female | 65 | 60  | 5   | 16  | 1   | 17 | 6   | 3  | 5  | N/A | N/A | +   | 0   | 9   | 2.90 ± 0.83    |
| 109 | iRBD | Male   | 72 | 62  | 10  | 11  | 2   | 14 | N/A | 5  | 9  | N/A | N/A | +   | 0   | N/A | 7.87 ± 1.34    |
| 110 | iRBD | Male   | 75 | 72  | 3   | 18  | 2   | 14 | 8   | 7  | 3  | N/A | N/A | N/A | 0   | 7   | 126.81 ± 19.12 |
| 111 | iRBD | Male   | 69 | 64  | 5   | 14  | 0   | 17 | 9   | 4  | 8  | N/A | N/A | +   | 0   | 12  | 1.10 ± 0.33    |
| 112 | iRBD | Female | 66 | 62  | 4   | 15  | 5   | 18 | 2   | 3  | 9  | N/A | N/A | N/A | 0   | 5   | 18.92 ± 2.02   |
| 113 | iRBD | Male   | 59 | 56  | 3   | 19  | 3   | 9  | 22  | 5  | 7  | N/A | N/A | +   | 0   | 9   | 32.97 ± 3.34   |
| 114 | iRBD | Male   | 75 | 66  | 9   | 18  | 0   | 17 | 1   | 5  | 7  | N/A | N/A | N/A | 0   | 11  | 16.64 ± 2.23   |
| 115 | iRBD | Male   | 55 | 40  | 15  | 21  | 0   | 11 | 0   | 8  | 12 | N/A | N/A | N/A | 0   | 5   | 6.29 ± 0.68    |
| 116 | iRBD | Male   | 69 | 66  | 3   | 15  | 8   | 12 | N/A | 13 | 7  | N/A | N/A | +   | 0   | 11  | 3.26 ± 0.44    |
| 117 | iRBD | Male   | 54 | 49  | 5   | 12  | 5   | 12 | 48  | 3  | 8  | N/A | N/A | +   | 5   | 13  | 19.17 ± 4.96   |
| 118 | iRBD | Male   | 74 | 72  | 2   | 16  | 0   | 15 | N/A | 6  | 7  | N/A | N/A | N/A | 0   | 10  | 3.82 ± 0.69    |

|     |      |        |    |     |     |     |     |    |     |    |    |     |     |     |     |     |                    |
|-----|------|--------|----|-----|-----|-----|-----|----|-----|----|----|-----|-----|-----|-----|-----|--------------------|
| 119 | iRBD | Male   | 66 | 61  | 5   | 15  | 3   | 18 | 21  | 7  | 6  | N/A | N/A | N/A | 0   | 10  | 0.93 ± 0.28        |
| 120 | iRBD | Male   | 70 | 63  | 7   | 20  | 2   | 13 | 31  | 8  | 1  | N/A | N/A | N/A | 1   | 5   | 6.08 ± 0.29        |
| 121 | iRBD | Male   | 67 | 50  | 17  | 13  | 0   | 17 | 2   | 10 | 7  | N/A | N/A | N/A | 0   | 10  | 4.15 ± 1.32        |
| 122 | iRBD | Male   | 67 | 56  | 11  | 17  | 0   | 17 | 3   | 4  | 9  | N/A | N/A | +   | 0   | 10  | 8.14 ± 1.95        |
| 123 | iRBD | Male   | 62 | 47  | 15  | 31  | 4   | 14 | N/A | 5  | 9  | N/A | N/A | +   | 1   | 9   | 7.49 ± 1.43        |
| 124 | iRBD | Male   | 70 | N/A | N/A | 15  | 0   | 18 | 1   | 4  | 7  | N/A | N/A | N/A | 0   | 5   | 4.10 ± 0.48        |
| 125 | iRBD | Female | 63 | 62  | 1   | 19  | 12  | 14 | N/A | 0  | 4  | N/A | N/A | N/A | 0   | 8   | 4.64 ± 4.76        |
| 126 | iRBD | Male   | 75 | 55  | 20  | 15  | 6   | 13 | N/A | 4  | 8  | N/A | N/A | +   | 1   | 8   | 35.60 ± 2.14       |
| 127 | iRBD | Male   | 67 | 61  | 6   | 16  | 5   | 13 | 23  | 1  | 3  | N/A | N/A | N/A | 0   | 11  | 17.04 ± 3.11       |
| 128 | iRBD | Male   | 70 | 67  | 3   | 22  | 3   | 14 | N/A | 3  | 3  | N/A | N/A | +   | 1   | 10  | 64.72 ± 3.37       |
| 129 | iRBD | Male   | 74 | 72  | 2   | 12  | 2   | 11 | N/A | 5  | 5  | N/A | N/A | N/A | 0   | 7   | 5.35 ± 1.06        |
| 130 | iRBD | Male   | 58 | 53  | 5   | 13  | 9   | 14 | N/A | 7  | 5  | N/A | N/A | +   | 3   | 11  | 2.55 ± 0.47        |
| 131 | iRBD | Female | 77 | 66  | 11  | 16  | 1   | 15 | 4   | 5  | 10 | N/A | N/A | N/A | 0   | 12  | 15.40 ± 2.58       |
| 132 | iRBD | Female | 59 | 55  | 4   | 16  | 1   | 15 | N/A | 4  | 10 | N/A | N/A | N/A | 0   | 7   | 24.68 ± 1.03       |
| 133 | iRBD | Male   | 68 | 60  | 8   | 18  | 2   | 18 | N/A | 4  | 7  | N/A | N/A | N/A | 0   | 9   | 4.34 ± 0.84        |
| 134 | iRBD | Male   | 63 | N/A | N/A | N/A | N/A | 18 | N/A | 2  | 7  | N/A | N/A | N/A | N/A | N/A | 5.34 ± 0.62        |
| 135 | iRBD | Male   | 64 | 62  | 2   | 12  | 5   | 14 | 102 | 5  | 10 | N/A | N/A | N/A | 0   | 13  | 2.89 ± 0.53        |
| 136 | iRBD | Male   | 61 | 50  | 11  | 16  | 6   | 18 | 76  | 5  | 9  | N/A | N/A | +   | 0   | 12  | 147.61 ± 8.84      |
| 137 | iRBD | Male   | 64 | 60  | 4   | N/A | N/A | 11 | 9   | 2  | 5  | N/A | N/A | N/A | N/A | N/A | 96912.87 ± 14905.2 |
| 138 | iRBD | Male   | 66 | 63  | 3   | 12  | 3   | 13 | 2   | 5  | 7  | N/A | N/A | N/A | 0   | 4   | 10.42 ± 1.18       |
| 139 | iRBD | Male   | 63 | 62  | 1   | 15  | 2   | 14 | 9   | 0  | 3  | N/A | N/A | N/A | 0   | 5   | 46.81 ± 3.15       |



|     |      |        |    |     |     |     |     |    |    |   |    |     |     |     |     |     |                  |
|-----|------|--------|----|-----|-----|-----|-----|----|----|---|----|-----|-----|-----|-----|-----|------------------|
| 140 | iRBD | Male   | 61 | 51  | 10  | 25  | 1   | 15 | 6  | 3 | 5  | N/A | N/A | +   | 1   | 12  | 223.93 ± 16.15   |
| 141 | iRBD | Male   | 58 | 54  | 4   | 15  | 2   | 17 | 6  | 1 | 6  | N/A | N/A | +   | 0   | 3   | 5.30 ± 0.66      |
| 142 | iRBD | Male   | 63 | 55  | 8   | 13  | 9   | 11 | 8  | 3 | 0  | N/A | N/A | N/A | 0   | 11  | 12.89 ± 0.74     |
| 143 | iRBD | Male   | 59 | 47  | 12  | 22  | 2   | 14 | 5  | 2 | 9  | N/A | N/A | N/A | 0   | 11  | 1.99 ± 1.39      |
| 144 | iRBD | Male   | 73 | 63  | 10  | 17  | 0   | 12 | 1  | 1 | 8  | N/A | N/A | N/A | 0   | 8   | 36.79 ± 4.54     |
| 145 | iRBD | Male   | 69 | 54  | 15  | 18  | 8   | 18 | 14 | 0 | 6  | N/A | N/A | +   | 0   | 10  | 30.49 ± 7.58     |
| 146 | iRBD | Male   | 60 | N/A | N/A | N/A | N/A | 12 | 15 | 3 | 7  | N/A | N/A | N/A | N/A | N/A | 10.48 ± 4.54     |
| 147 | iRBD | Male   | 63 | 53  | 10  | 17  | 0   | 18 | 25 | 3 | 2  | N/A | N/A | N/A | 0   | 7   | 1.46 ± 0.83      |
| 148 | iRBD | Male   | 60 | 50  | 10  | 15  | 2   | 17 | 7  | 2 | 7  | N/A | N/A | +   | 0   | 2   | 28.32 ± 4.72     |
| 149 | iRBD | Male   | 74 | 71  | 3   | 19  | 1   | 18 | 18 | 9 | 9  | N/A | N/A | +   | 0   | 12  | 6.67 ± 1.46      |
| 150 | iRBD | Male   | 56 | 53  | 3   | N/A | N/A | 14 | 17 | 2 | 10 | N/A | N/A | N/A | N/A | N/A | 7.65 ± 0.55      |
| 151 | iRBD | Male   | 72 | 58  | 14  | 8   | 1   | 17 | 12 | 1 | 5  | N/A | N/A | N/A | 0   | 12  | 59941.25 ± 16328 |
| 152 | iRBD | Male   | 65 | 61  | 4   | 13  | 1   | 18 | 6  | 3 | 4  | N/A | N/A | N/A | 0   | 7   | 30.55 ± 1.42     |
| 153 | iRBD | Male   | 74 | 68  | 6   | 12  | 6   | 15 | 13 | 2 | 6  | N/A | N/A | N/A | 0   | 10  | 19.34 ± 2.84     |
| 154 | iRBD | Male   | 72 | 57  | 15  | 17  | 0   | 14 | 19 | 5 | 5  | N/A | N/A | N/A | 0   | 10  | 59.57 ± 4.69     |
| 155 | iRBD | Male   | 67 | 65  | 2   | 11  | 4   | 12 | 11 | 1 | 3  | N/A | N/A | +   | 0   | 6   | 24.92 ± 4.06     |
| 156 | iRBD | Male   | 80 | 60  | 20  | 19  | 0   | 14 | 15 | 7 | 6  | N/A | N/A | N/A | 0   | 7   | 5.98 ± 2.15      |
| 157 | iRBD | Male   | 68 | 63  | 5   | 18  | 6   | 15 | 40 | 2 | 4  | N/A | N/A | +   | 0   | 12  | 18.98 ± 4.67     |
| 158 | iRBD | Female | 77 | 70  | 7   | 13  | 6   | 14 | 24 | 4 | 6  | N/A | N/A | +   | 1   | 7   | 24.75 ± 1.54     |
| 159 | iRBD | Male   | 74 | 69  | 5   | 17  | 1   | 14 | 16 | 2 | 0  | N/A | N/A | N/A | 0   | 11  | 100.09 ± 8.34    |
| 160 | iRBD | Male   | 69 | 64  | 5   | 13  | 4   | 15 | 21 | 7 | 4  | N/A | N/A | N/A | 0   | 10  | 23.66 ± 1.97     |

|     |      |        |    |     |     |     |     |    |     |     |    |     |     |     |     |     |               |
|-----|------|--------|----|-----|-----|-----|-----|----|-----|-----|----|-----|-----|-----|-----|-----|---------------|
| 161 | iRBD | Male   | 60 | 59  | 1   | 11  | 3   | 16 | 29  | 1   | 4  | N/A | N/A | N/A | 1   | 13  | 0.94 ± 0.82   |
| 162 | iRBD | Male   | 61 | 59  | 2   | N/A | N/A | 18 | 15  | 2   | 8  | N/A | N/A | N/A | N/A | N/A | 58.18 ± 5.88  |
| 163 | iRBD | Male   | 57 | 38  | 19  | 17  | 0   | 15 | 38  | 3   | 7  | N/A | N/A | N/A | 0   | 12  | 10.91 ± 1.89  |
| 164 | iRBD | Female | 56 | 50  | 6   | 13  | 4   | 17 | 27  | 2   | 9  | N/A | N/A | N/A | 1   | 12  | 2.87 ± 0.87   |
| 165 | iRBD | Male   | 68 | 48  | 20  | N/A | N/A | 11 | 40  | N/A | 7  | N/A | N/A | N/A | N/A | N/A | 1.29 ± 0.14   |
| 166 | iRBD | Male   | 76 | 70  | 6   | 15  | 3   | 15 | 18  | 12  | 10 | N/A | N/A | N/A | 1   | 11  | 146.32 ± 6.96 |
| 167 | HC   | Male   | 18 | N/A | N/A | 12  | 3   | 15 | N/A | N/A | 10 | N/A | N/A | N/A | 0   | 2   | 4.29 ± 2.43   |
| 168 | HC   | Male   | 62 | N/A | N/A | 18  | 0   | 14 | N/A | N/A | 10 | N/A | N/A | N/A | 0   | 3   | 3.57 ± 2.43   |
| 169 | HC   | Male   | 70 | N/A | N/A | 16  | 7   | 10 | N/A | N/A | 11 | N/A | N/A | N/A | 0   | 0   | 33.19 ± 3.44  |
| 170 | HC   | Female | 58 | N/A | N/A | 16  | 0   | 17 | N/A | N/A | 11 | N/A | N/A | N/A | 0   | 0   | 80.06 ± 24.21 |
| 171 | HC   | Female | 74 | N/A | N/A | 11  | 4   | 12 | N/A | N/A | 10 | N/A | N/A | N/A | 1   | 1   | 73.96 ± 4.57  |
| 172 | HC   | Male   | 70 | N/A | N/A | 12  | 0   | 12 | N/A | N/A | 10 | N/A | N/A | N/A | 0   | 1   | 45.82 ± 2.48  |
| 173 | HC   | Female | 55 | N/A | N/A | 15  | 1   | 18 | N/A | N/A | 11 | N/A | N/A | N/A | 0   | 1   | 2.03 ± 1.35   |
| 174 | HC   | Female | 20 | N/A | N/A | 14  | 4   | 15 | N/A | N/A | 11 | N/A | N/A | N/A | 0   | 1   | 5.24 ± 0.46   |
| 175 | HC   | Female | 20 | N/A | N/A | 14  | 5   | 16 | N/A | N/A | 10 | N/A | N/A | N/A | 0   | 3   | 6.01 ± 1.70   |
| 176 | HC   | Female | 78 | N/A | N/A | 12  | 4   | 18 | N/A | N/A | 11 | N/A | N/A | N/A | 0   | 3   | 28.93 ± 4.84  |
| 177 | HC   | Female | 66 | N/A | N/A | 14  | 0   | 17 | N/A | N/A | 11 | N/A | N/A | N/A | 0   | 3   | 13.36 ± 2.41  |
| 178 | HC   | Male   | 75 | N/A | N/A | 18  | 0   | 14 | 27  | N/A | 11 | N/A | N/A | N/A | 0   | 0   | 17.56 ± 1.81  |
| 179 | HC   | Male   | 74 | N/A | N/A | 10  | 2   | 13 | 8   | N/A | 10 | N/A | N/A | N/A | 0   | 0   | 1.74 ± 0.19   |
| 180 | HC   | Female | 70 | N/A | N/A | 11  | 0   | 18 | 9   | N/A | 11 | N/A | N/A | N/A | 3   | 2   | 5.78 ± 1.81   |
| 181 | HC   | Female | 63 | N/A | N/A | 20  | 4   | 18 | 1   | N/A | 11 | N/A | N/A | N/A | 0   | 2   | 4.15 ± 0.37   |

|     |    |        |    |     |     |    |    |     |     |     |     |     |     |     |   |   |               |
|-----|----|--------|----|-----|-----|----|----|-----|-----|-----|-----|-----|-----|-----|---|---|---------------|
| 182 | HC | Female | 66 | N/A | N/A | 18 | 7  | 18  | 10  | N/A | 12  | N/A | N/A | N/A | 0 | 2 | 6.66 ± 0.43   |
| 183 | HC | Male   | 34 | N/A | N/A | 16 | 7  | 17  | 1   | N/A | 11  | N/A | N/A | N/A | 0 | 1 | 51.35 ± 0.81  |
| 184 | HC | Female | 72 | N/A | N/A | 18 | 1  | 18  | 10  | N/A | 10  | N/A | N/A | N/A | 1 | 0 | 13.00 ± 2.49  |
| 185 | HC | Male   | 77 | N/A | N/A | 23 | 5  | 15  | 0   | N/A | 11  | N/A | N/A | N/A | 0 | 2 | 6.84 ± 0.90   |
| 186 | HC | Female | 60 | N/A | N/A | 16 | 0  | 18  | 18  | N/A | 12  | N/A | N/A | N/A | 0 | 4 | 2.93 ± 1.01   |
| 187 | HC | Female | 64 | N/A | N/A | 13 | 2  | 18  | N/A | N/A | N/A | N/A | N/A | N/A | 1 | 2 | 19.37 ± 1.97  |
| 188 | HC | Female | 61 | N/A | N/A | 14 | 2  | 17  | 3   | N/A | 8   | N/A | N/A | N/A | 0 | 1 | 12.08 ± 1.34  |
| 189 | HC | Male   | 36 | N/A | N/A | 20 | 0  | 18  | 4   | N/A | 11  | N/A | N/A | N/A | 0 | 1 | 0.84 ± 0.25   |
| 190 | HC | Male   | 62 | N/A | N/A | 13 | 1  | N/A | N/A | N/A | N/A | N/A | N/A | N/A | 2 | 2 | 0.68 ± 0.22   |
| 191 | HC | Female | 60 | N/A | N/A | 20 | 0  | 18  | 18  | N/A | 2   | N/A | N/A | N/A | 0 | 0 | 0.86 ± 0.38   |
| 192 | HC | Male   | 52 | N/A | N/A | 15 | 0  | 14  | 4   | N/A | 10  | N/A | N/A | N/A | 0 | 0 | 2.01 ± 0.23   |
| 193 | HC | Female | 66 | N/A | N/A | 19 | 2  | 15  | 1   | N/A | 10  | N/A | N/A | N/A | 0 | 0 | 38.59 ± 4.2   |
| 194 | HC | Female | 63 | N/A | N/A | 12 | 4  | 17  | 34  | N/A | 11  | N/A | N/A | N/A | 0 | 0 | 1.20 ± 0.10   |
| 195 | HC | Male   | 59 | N/A | N/A | 16 | 1  | N/A | 11  | N/A | 11  | N/A | N/A | N/A | 0 | 2 | 0.30 ± 0.24   |
| 196 | HC | Female | 71 | N/A | N/A | 16 | 11 | 18  | 15  | N/A | 11  | N/A | N/A | N/A | 0 | 4 | 14.93 ± 4.15  |
| 197 | HC | Female | 70 | N/A | N/A | 12 | 0  | 17  | 16  | N/A | 6   | N/A | N/A | N/A | 0 | 4 | 70.07 ± 10.59 |
| 198 | HC | Female | 48 | N/A | N/A | 17 | 1  | 18  | 1   | N/A | 11  | N/A | N/A | N/A | 0 | 0 | 3.55 ± 1.91   |
| 199 | HC | Male   | 65 | N/A | N/A | 18 | 2  | 18  | 4   | N/A | 11  | N/A | N/A | N/A | 0 | 2 | 0.40 ± 0.09   |
| 200 | HC | Male   | 72 | N/A | N/A | 22 | 1  | 13  | 14  | N/A | 7   | N/A | N/A | N/A | 0 | 3 | 1.58 ± 0.47   |
| 201 | HC | Female | 50 | N/A | N/A | 15 | 2  | 18  | 18  | N/A | 11  | N/A | N/A | N/A | 0 | 5 | 1.42 ± 0.82   |
| 202 | HC | Male   | 43 | N/A | N/A | 21 | 0  | 14  | 0   | N/A | 10  | N/A | N/A | N/A | 0 | 0 | 7.07 ± 1.02   |

|     |    |        |    |     |     |    |   |    |    |     |     |     |     |     |   |   |                |
|-----|----|--------|----|-----|-----|----|---|----|----|-----|-----|-----|-----|-----|---|---|----------------|
| 203 | HC | Male   | 57 | N/A | N/A | 22 | 0 | 15 | 3  | N/A | 11  | N/A | N/A | N/A | 0 | 1 | 1.56 ± 0.16    |
| 204 | HC | Female | 69 | N/A | N/A | 21 | 0 | 16 | 2  | N/A | 7   | N/A | N/A | N/A | 0 | 0 | 1.47 ± 0.14    |
| 205 | HC | Female | 48 | N/A | N/A | 13 | 3 | 17 | 3  | N/A | 12  | N/A | N/A | N/A | 0 | 0 | 10.77 ± 1.16   |
| 206 | HC | Female | 39 | N/A | N/A | 18 | 4 | 15 | 3  | N/A | 11  | N/A | N/A | N/A | 0 | 0 | 119.64 ± 11.56 |
| 207 | HC | Female | 42 | N/A | N/A | 17 | 3 | 18 | 21 | N/A | 11  | N/A | N/A | N/A | 0 | 0 | 3.28 ± 0.34    |
| 208 | HC | Female | 53 | N/A | N/A | 15 | 1 | 17 | 2  | N/A | 11  | N/A | N/A | N/A | 0 | 3 | 2.67 ± 0.43    |
| 209 | HC | Female | 24 | N/A | N/A | 18 | 6 | 17 | 18 | N/A | 11  | N/A | N/A | N/A | 2 | 1 | 1.15 ± 0.58    |
| 210 | HC | Female | 52 | N/A | N/A | 15 | 4 | 13 | 46 | N/A | 11  | N/A | N/A | N/A | 0 | 4 | 1.14 ± 1.24    |
| 211 | HC | Female | 20 | N/A | N/A | 14 | 8 | 18 | 10 | N/A | 12  | N/A | N/A | N/A | 0 | 5 | 5.54 ± 1.23    |
| 212 | HC | Male   | 78 | N/A | N/A | 12 | 0 | 13 | 32 | N/A | N/A | N/A | N/A | N/A | 1 | 5 | 2.82 ± 0.96    |
| 213 | HC | Male   | 26 | N/A | N/A | 13 | 0 | 18 | 2  | N/A | 11  | N/A | N/A | N/A | 0 | 0 | 4.18 ± 0.92    |
| 214 | HC | Male   | 38 | N/A | N/A | 17 | 3 | 17 | 0  | N/A | 12  | N/A | N/A | N/A | 0 | 3 | 292.79 ± 91.38 |
| 215 | HC | Female | 81 | N/A | N/A | 13 | 4 | 10 | 71 | N/A | 12  | N/A | N/A | N/A | 4 | 5 | 35.53 ± 9.47   |
| 216 | HC | Female | 61 | N/A | N/A | 23 | 5 | 18 | 16 | N/A | 9   | N/A | N/A | N/A | 1 | 1 | 6.87 ± 1.11    |
| 217 | HC | Male   | 64 | N/A | N/A | 18 | 3 | 13 | 20 | N/A | 11  | N/A | N/A | N/A | 0 | 2 | 0.93 ± 0.45    |

PD, Parkinson's disease; iRBD, isolated rapid eye movement sleep behavior disorder; HC, healthy control; CCCSS, Cleveland Clinic Constipation Scoring System; NMSS, Non-Motor Symptoms Scale; MDS-UPDRS III, Movement Disorder Society's Unified Parkinson's Disease Rating Scale Part III; RBDSQ, iRBD screening questionnaire; SD, standard deviation; N/A, not available

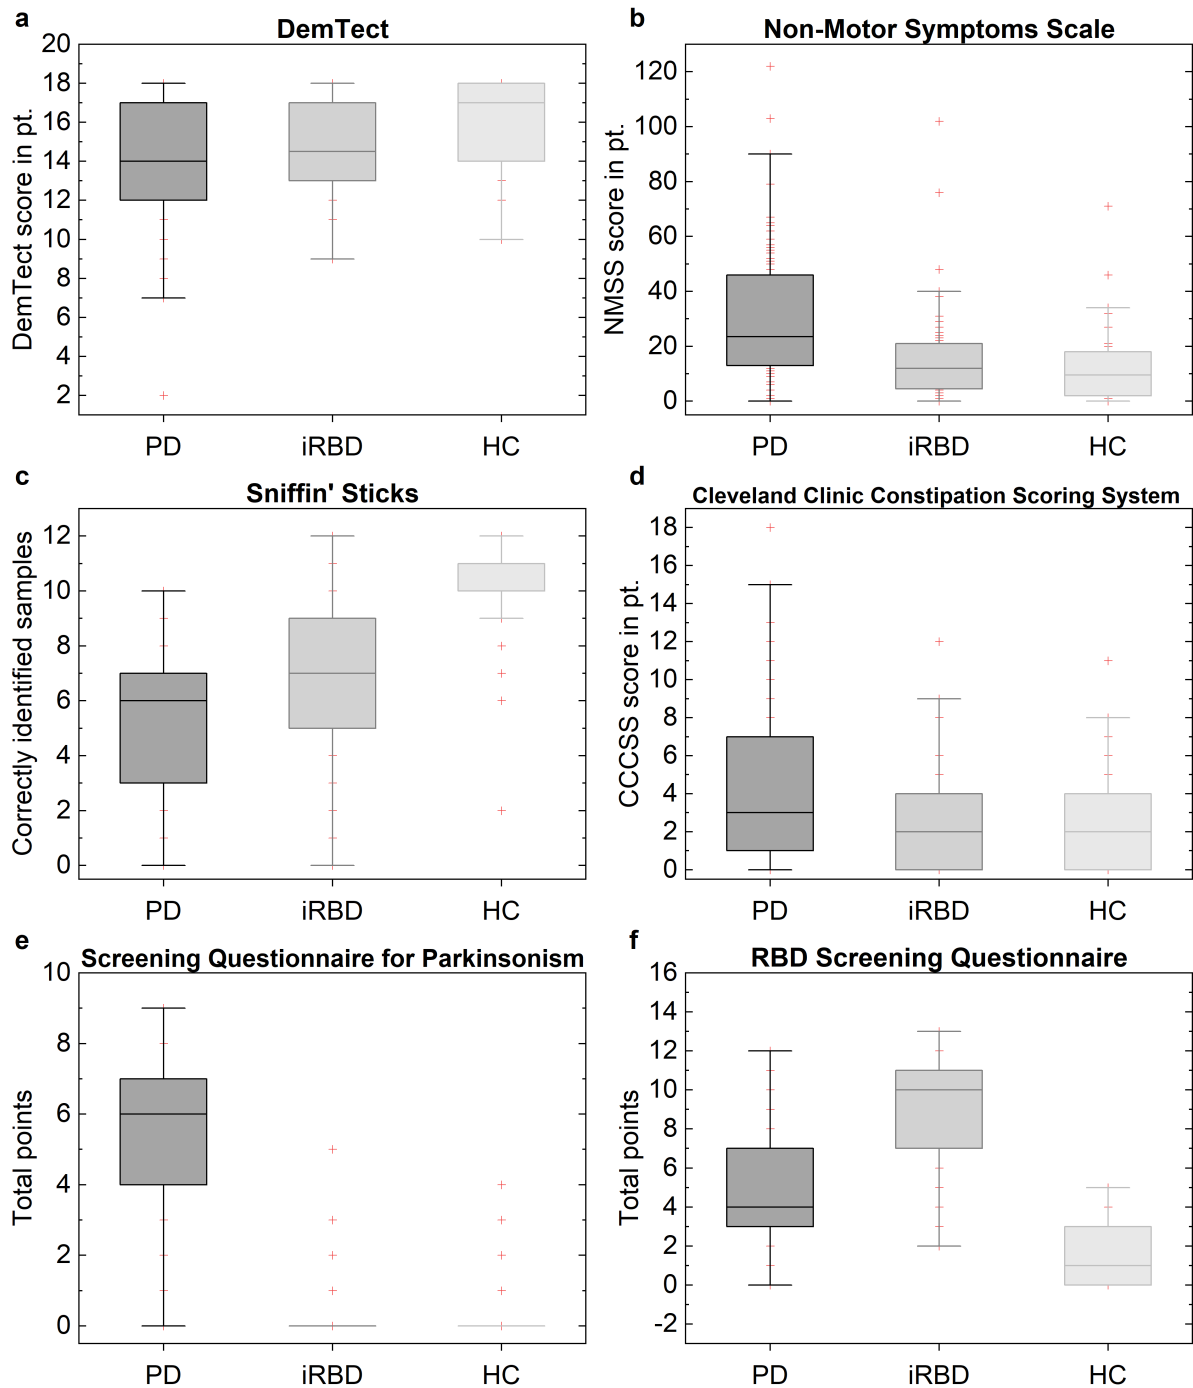

**Supplementary Fig. 1** Results for PD and iRBD patients and healthy controls based on their performance in various tests and screening questionnaires.

**a** The DemTect score showed that the cognitive performance of healthy controls ( $15.9 \pm 2.3$ ) was significantly higher than that of PD ( $13.8 \pm 3.3$ ,  $p < 0.001$ ) and iRBD patients ( $14.8 \pm 2.3$ ,  $p = 0.020$ ). **b** Based on the Non-Motor Symptoms Scale (NMSS), the performance of PD patients was significantly worse than that of iRBD patients ( $30.6 \pm 23.1$  vs.  $16.2 \pm 18.0$ ,  $p < 0.001$ ) and healthy controls ( $12.5 \pm 14.4$ ,  $p < 0.001$ ). **c** Also, the olfactory performance of PD patients ( $5.3 \pm 2.6$ ) was significantly worse ( $p < 0.01$ ) than that of iRBD patients ( $6.6 \pm 2.7$ ) and healthy controls ( $10.4 \pm 1.7$ ), based on correctly

identified sniffin' sticks. **d** Based on the Cleveland Clinic Constipation Scoring System (CCCSS), PD patients ( $4.1 \pm 4.0$ ) were significantly more ( $p < 0.05$ ) constipated than iRBD patients ( $2.8 \pm 2.7$ ) and healthy controls ( $2.5 \pm 2.5$ ). **e** PD patients ( $5.6 \pm 2.2$ ) scored significantly higher ( $p < 0.001$ ) than iRBD patients ( $0.3 \pm 0.8$ ) and healthy controls ( $0.3 \pm 0.8$ ) on the Screening Questionnaire for Parkinsonism. **f** The RBD Screening Questionnaire (RBDSQ) revealed significant differences ( $p < 0.001$ ) between iRBD ( $9.0 \pm 2.7$ ) and PD patients ( $4.9 \pm 3.0$ ) or healthy controls ( $1.7 \pm 1.6$ ), and between PD patients and healthy controls.

**Supplementary Table 2** The coefficient of variation of each experiment for  $\alpha$ -synuclein SiNaPs and stool samples

| Experiment | Coefficient of variation [%] |               |
|------------|------------------------------|---------------|
|            | $\alpha$ -synuclein SiNaPs   | Stool samples |
| 1          | 27.22                        | 40.53         |
| 2          | 16.74                        | 25.32         |
| 3          | 17.41                        | 19.34         |
| 4          | 37.19                        | 27.92         |
| 5          | 33.25                        | 22.12         |
| 6          | 25.32                        | 22.11         |
| 7          | 33.05                        | 28.82         |
| 8          | 28.50                        | 25.50         |
| 9          | 36.98                        | 25.31         |
| Mean       | 28.41                        | 26.33         |

**Supplementary Table 3** LOD values for  $\alpha$ -synuclein SiNaPs for each experiment

| Experiment | LOD [fM] |
|------------|----------|
| 1          | 0.06     |
| 2          | –        |
| 3          | 0.05     |
| 4          | 0.72     |
| 5          | 0.15     |
| 6          | 0.11     |
| 7          | 0.22     |
| 8          | 0.69     |
| 9          | 0.43     |
| Mean       | 0.30     |

LOD, limit of detection



**Supplementary Table 4** Number of stool samples above the LOD for each individual experiment

| Experiment | Number of samples measured / number of samples above the LOD |
|------------|--------------------------------------------------------------|
| 1          | 27 / 27                                                      |
| 2          | 27 / 27                                                      |
| 3          | 24 / 24                                                      |
| 4          | 27 / 27                                                      |
| 5          | 26 / 26                                                      |
| 6          | 26 / 26                                                      |
| 7          | 26 / 26                                                      |
| 8          | 25 / 25                                                      |
| 9          | 9 / 9                                                        |
| <b>Sum</b> | <b>217 / 217</b>                                             |

LOD, limit of detection

**Supplementary Table 5** P-values of tests on normal distribution for  $\alpha$ -synuclein aggregate concentrations in stool

|                    | PD                    | iRBD                  | HC                    |
|--------------------|-----------------------|-----------------------|-----------------------|
| Shapiro Wilk       | 0                     | 0                     | $2.0 \times 10^{-12}$ |
| Lilliefors         | $3.5 \times 10^{-39}$ | $5.4 \times 10^{-59}$ | $5.1 \times 10^{-15}$ |
| Kolmogorov Smirnov | $6.0 \times 10^{-13}$ | $1.7 \times 10^{-19}$ | $2.5 \times 10^{-5}$  |
| Anderson Darling   | $3.7 \times 10^{-54}$ | $9.7 \times 10^{-61}$ | $1.2 \times 10^{-21}$ |

PD, Parkinson's disease; iRBD, isolated rapid eye movement sleep behavior disorder; HC, healthy control

**Supplementary Table 6** Spearman coefficient of correlation for  $\alpha$ -synuclein aggregate concentrations in stool and age, education, sex, DemTect score, disease duration, MDS-UPDRS III, or questionnaires for PD or iRBD

|                                          | All cohorts | PD      | iRBD   | HC     |
|------------------------------------------|-------------|---------|--------|--------|
| Age                                      | 0.183*      | 0.125   | 0.155  | 0.195  |
| Education                                | 0.041       | 0.088   | 0.124  | -0.187 |
| Sex                                      | 0.008       | 0.007   | -0.074 | 0.202  |
| DemTect                                  | 0.074       | 0.221*  | -0.166 | -0.140 |
| Disease duration                         | -0.050      | -0.003  | 0.069  | N/A    |
| MDS-UPDRS III                            | -0.282*     | -0.0004 | -0.210 | N/A    |
| Screening questionnaire for parkinsonism | -0.154*     | 0.057   | 0.031  | 0.066  |
| RBDSQ                                    | 0.188*      | 0.223*  | -0.020 | -0.054 |

PD, Parkinson's disease; iRBD, isolated rapid eye movement sleep behavior disorder; HC, healthy control; MDS-UPDRS, Movement Disorder Society's Unified Parkinson's Disease Rating Scale Part III; N/A, not applicable; RBDSQ, REM sleep behavior disorder screening questionnaire; \*  $p < 0.05$
